# Supplementary material
Source: HighWire-hosted journal article supplement (https://qualitysafety.bmj.com/content/29/12/1008)
Supplement: inline-supplementary-material-4 [file inline-supplementary-material-4.pdf]

**Appendix Table 4. Study Quality Assessment**

| Author/Year                                                                                      | Representativeness | Random sampling | Sample Size | Description | Data analysis | Objective standards | Reviewer training/IRR | Statistical analysis | Complete data |
|--------------------------------------------------------------------------------------------------|--------------------|-----------------|-------------|-------------|---------------|---------------------|-----------------------|----------------------|---------------|
| <i>Studies with randomly selected cohorts that report incidence of diagnostic error</i>          |                    |                 |             |             |               |                     |                       |                      |               |
| Wilson, 1995                                                                                     | No                 | Yes             | Yes         | Yes         | Yes           | Yes                 | Yes                   | Yes                  | Yes           |
| Thomas, 2000                                                                                     | No                 | Yes             | Yes         | Yes         | Yes           | Yes                 | Yes                   | Yes                  | Yes           |
| Neale, 2001                                                                                      | No                 | Yes             | No          | Yes         | Yes           | Yes                 | No                    | Yes                  | Yes           |
| Davis, 2003                                                                                      | No                 | Yes             | Yes         | Yes         | Yes           | No                  | Yes                   | Yes                  | Yes           |
| Baker, 2004                                                                                      | No                 | Yes             | Yes         | Yes         | Yes           | No                  | Yes                   | Yes                  | Yes           |
| Forster, 2004                                                                                    | No                 | Yes             | No          | Yes         | Yes           | Yes                 | Yes                   | Yes                  | Yes           |
| Sari, 2007                                                                                       | No                 | Yes             | Yes         | Yes         | Yes           | No                  | Yes                   | Yes                  | Yes           |
| Aranaz-Andres, 2008                                                                              | No                 | Yes             | Yes         | Yes         | Yes           | Yes                 | Yes                   | Yes                  | Yes           |
| Asavaroengchai, 2009                                                                             | No                 | Yes             | No          | Yes         | Yes           | No                  | No                    | Yes                  | Yes           |
| Mendes, 2009                                                                                     | No                 | Yes             | Yes         | Yes         | Yes           | No                  | No                    | Yes                  | Yes           |
| Soop, 2009                                                                                       | No                 | Yes             | Yes         | Yes         | Yes           | Yes                 | Yes                   | Yes                  | Yes           |
| Landrigan, 2010                                                                                  | No                 | Yes             | Yes         | Yes         | Yes           | No                  | Yes                   | Yes                  | Yes           |
| Letaief, 2010                                                                                    | No                 | Yes             | Yes         | Yes         | Yes           | No                  | Yes                   | Yes                  | Yes           |
| Limon-Ramirez, 2012                                                                              | No                 | Yes             | No          | Yes         | Yes           | No                  | No                    | Yes                  | Yes           |
| Wilson, 2012                                                                                     | No                 | Yes             | Yes         | Yes         | Yes           | Yes                 | No                    | Yes                  | Yes           |
| Martinez-Mondejar, 2013                                                                          | No                 | Yes             | Yes         | Yes         | Yes           | No                  | No                    | Yes                  | Yes           |
| Lancis-Sepulveda, 2014                                                                           | No                 | Yes             | Yes         | Yes         | Yes           | No                  | No                    | Yes                  | Yes           |
| Akbari Sari, 2015                                                                                | No                 | Yes             | No          | No          | Yes           | Yes                 | No                    | Yes                  | Yes           |
| Wang, 2016                                                                                       | No                 | Yes             | Yes         | Yes         | Yes           | No                  | No                    | Yes                  | Yes           |
| Rafter, 2017                                                                                     | No                 | Yes             | Yes         | Yes         | Yes           | No                  | Yes                   | Yes                  | Yes           |
| Aranaz-Andres, 2017                                                                              | No                 | Yes             | No          | Yes         | Yes           | No                  | No                    | Yes                  | Yes           |
| Halfon, 2017                                                                                     | No                 | Yes             | Yes         | Yes         | Yes           | No                  | Yes                   | Yes                  | Yes           |
| <i>Studies with randomly selected cohorts that report one day prevalence of diagnostic error</i> |                    |                 |             |             |               |                     |                       |                      |               |
| Aranaz-Andres, 2011                                                                              | No                 | Yes             | Yes         | Yes         | Yes           | Yes                 | Yes                   | Yes                  | Yes           |
| Mendes, 2018                                                                                     | No                 | Yes             | No          | Yes         | Yes           | No                  | No                    | Yes                  | Yes           |
| <i>Studies of cohorts with selection criteria</i>                                                |                    |                 |             |             |               |                     |                       |                      |               |

|                              |    |         |     |     |     |     |     |     |     |
|------------------------------|----|---------|-----|-----|-----|-----|-----|-----|-----|
| <b>Leape, 1991</b>           | No | Yes     | Yes | Yes | Yes | Yes | Yes | Yes | Yes |
| <b>Nenner, 1994</b>          | No | No      | Yes | No  | Yes | No  | No  | No  | Yes |
| <b>Liu, 2002</b>             | No | Yes     | No  | Yes | Yes | No  | No  | Yes | Yes |
| <b>Tudela, 2002</b>          | No | Yes     | No  | No  | Yes | No  | No  | Yes | Yes |
| <b>Forster, 2003</b>         | No | Yes     | No  | Yes | Yes | No  | No  | Yes | No  |
| <b>Judez-Legaristi, 2009</b> | No | Yes     | No  | No  | Yes | No  | No  | Yes | Yes |
| <b>Rahim, 2009</b>           | No | Yes     | No  | Yes | Yes | No  | No  | Yes | Yes |
| <b>Gea-Velazquez, 2010</b>   | No | No      | Yes | No  | Yes | Yes | No  | Yes | Yes |
| <b>Zwaan, 2010</b>           | No | Yes     | Yes | Yes | Yes | Yes | Yes | Yes | Yes |
| <b>Bapoje, 2011</b>          | No | Yes     | No  | Yes | Yes | No  | No  | Yes | Yes |
| <b>Forster, 2011</b>         | No | Yes     | No  | Yes | Yes | Yes | No  | Yes | Yes |
| <b>Baines, 2013</b>          | No | Yes     | Yes | Yes | Yes | Yes | Yes | Yes | Yes |
| <b>Zwaan, 2013</b>           | No | No      | No  | Yes | Yes | No  | Yes | Yes | Yes |
| <b>Van Rosse, 2014</b>       | No | Yes     | Yes | Yes | Yes | No  | Yes | Yes | Yes |
| <b>Amaral, 2015</b>          | No | Yes     | No  | Yes | Yes | No  | Yes | Yes | No  |
| <b>Baines, 2015</b>          | No | Yes     | Yes | Yes | Yes | No  | Yes | Yes | Yes |
| <b>Marquet, 2015</b>         | No | Yes     | Yes | Yes | Yes | Yes | No  | Yes | Yes |
| <b>Al-Jaghbeer, 2016</b>     | No | Yes     | Yes | Yes | Yes | Yes | Yes | Yes | Yes |
| <b>Bellandi, 2017</b>        | No | Yes     | Yes | Yes | Yes | No  | Yes | Yes | Yes |
| <b>Bellido, 2017</b>         | No | Unclear | No  | No  | Yes | No  | No  | Yes | Yes |
| <b>Letaief, 2017</b>         | No | Yes     | Yes | No  | Yes | No  | No  | Yes | Yes |
| <b>Zhang, 2017</b>           | No | Yes     | No  | Yes | Yes | Yes | No  | Yes | Yes |

IRR, inter-rater reliability.
